# Supplementary material for: Analysis of combined and isolated effects of land-use and land-cover changes and climate change on the upper Blue Nile River basin's streamflow
Source: Copernicus journal article supplement (doi:10.5194/hess-22-6187-2018), 2018-11-30
Supplement: Supplementary file 1 [file hess-22-6187-2018-supplement.zip]

Table S01: List of weather stations and percentage gaps

| No. | Station Name   | Elevation<br>(masl) | Location |          | Rainfall records |            |           | Temperature records |            |           |
|-----|----------------|---------------------|----------|----------|------------------|------------|-----------|---------------------|------------|-----------|
|     |                |                     | Easting  | Northing | Start date       | End date   | % of gaps | Start date          | End date   | % of gaps |
| 1   | Gondar**       | 1967                | 37.43    | 12.52    | 01/01/1952       | 09/30/2011 | 7.5       | 01/01/1952          | 09/30/2012 | 10.1      |
| 2   | Debre Markos** | 2515                | 37.67    | 10.33    | 01/01/1954       | 07/31/2012 | 1.9       | 01/01/1953          | 07/31/2012 | 3.0       |
| 3   | Debre Tabor**  | 2612                | 38       | 11.87    | 01/01/1954       | 12/31/2011 | 27.8      | 01/01/1951          | 12/31/2011 | 28.6      |
| 4   | Dangila**      | 2116                | 36.85    | 11.43    | 01/01/1954       | 12/31/2011 | 34.2      | 01/01/1954          | 12/31/2011 | 31.3      |
| 5   | Enjibara+      | 2670                | 36.9     | 10.97    | 01/01/1954       | 12/31/2011 | 38.7      |                     |            |           |
| 6   | Debark+        | 1900                | 37.9     | 13.16    | 01/01/1955       | 12/31/2011 | 57.7      | 01/01/1973          | 12/31/2011 | 44.9      |
| 7   | Dejen+         | 2420                | 38.15    | 10.17    | 01/01/1957       | 11/30/2011 | 60.8      |                     |            |           |
| 8   | Gbet*          | 2320                | 36.6     | 10.75    | 01/01/1958       | 12/31/2011 | 32.4      |                     |            |           |
| 9   | Feres bet+     | 2870                | 37.61    | 10.85    | 01/01/1959       | 12/31/2007 | 54.7      |                     |            |           |
| 10  | Bahir Dar **   | 1770                | 37.42    | 11.6     | 01/01/1961       | 09/30/2012 | 1.6       | 01/01/1961          | 09/30/2012 | 1.5       |
| 11  | Shambu*        | 2460                | 37.12    | 9.57     | 01/01/1961       | 11/30/2014 | 33.5      | 05/01/1974          | 12/31/2014 | 33.1      |
| 12  | Ayikel+        | 2150                | 37.05    | 12.53    | 01/01/1968       | 12/31/2011 | 37.4      | 01/01/1969          | 11/30/2011 | 31.9      |
| 13  | Angerguten*    | 1350                | 36.33    | 9.27     | 01/04/1972       | 10/31/2011 | 39.5      | 01/01/1972          | 10/31/2011 | 33.0      |
| 14  | Zege+          | 1800                | 37.32    | 11.71    | 01/01/1974       | 12/31/2011 | 38.9      | 01/01/1974          | 12/31/2011 | 20.5      |
| 15  | Tillili+       | 2570                | 37.05    | 10.58    | 01/01/1974       | 09/30/2011 | 31.9      |                     |            |           |
| 16  | Nedjo**        | 1800                | 35.45    | 9.5      | 01/03/1974       | 12/31/2014 | 20.3      | 03/01/1974          | 12/31/2014 | 24.9      |
| 17  | Abayshaleko+   | 1790                | 38.16    | 10.11    | 01/01/1983       | 12/31/2011 | 10.6      | 01/01/1983          | 12/31/2011 | 33.0      |
| 18  | Alem Ketema*   | 2280                | 39.03    | 10.03    | 01/01/1973       | 01/31/2013 | 7.6       | 01/01/1973          | 09/30/2013 | 32.5      |
| 19  | Mehal Meda +   | 3084                | 39.66    | 10.31    | 01/01/1984       | 11/30/2014 | 9.7       | 01/01/1984          | 12/31/2014 | 12.2      |
| 20  | Gidayana+      | 1850                | 36.62    | 9.87     | 01/01/1970       | 10/31/2011 | 7.5       | 01/01/1989          | 08/31/2011 | 33.6      |
| 21  | Dedessa+       | 1310                | 36.1     | 9.38     | 01/01/1984       | 10/31/2014 | 12.7      | 01/01/1984          | 10/31/2014 | 35.0      |
| 22  | Fiche+         | 2784                | 38.73    | 9.77     | 01/01/1984       | 02/28/2015 | 1.4       | 01/01/1984          | 12/31/2014 | 4.3       |
| 23  | Anger+         | 1350                | 36.33    | 9.27     | 01/01/1984       | 12/31/2014 | 14.6      | 01/01/1984          | 12/31/2011 | 37.6      |
| 24  | Gatira+        | 2358                | 36.2     | 7.98     | 01/01/1984       | 06/30/2014 | 14.9      | 01/01/1990          | 12/31/2014 | 47.3      |
| 25  | Wegel Tena+    | 2952                | 39.22    | 11.59    | 01/01/1984       | 12/31/2014 | 21.6      | 01/01/1984          | 12/31/2014 | 35.3      |
| 26  | Chagni+        | 1614                | 36.5     | 10.97    | 05/27/1973       | 12/31/2011 | 14.6      | 01/01/1984          | 11/30/2014 | 26.9      |

|    |               |      |       |       |            |            |      |            |            |      |
|----|---------------|------|-------|-------|------------|------------|------|------------|------------|------|
| 27 | Debre Berhan+ | 2750 | 39.5  | 9.63  | 01/01/1984 | 12/31/2014 | 1.9  | 01/01/1984 | 11/30/2014 | 1.2  |
| 28 | Bedele*       | 2011 | 36.33 | 8.45  | 01/02/1970 | 05/31/2011 | 10.2 | 02/01/1970 | 05/31/2013 | 17.2 |
| 29 | Adet+         | 2179 | 37.49 | 11.27 | 01/01/1986 | 12/31/2014 | 4.5  | 01/01/1986 | 11/30/2014 | 10.3 |
| 30 | Pawe+         | 1119 | 36.41 | 11.31 | 01/12/1986 | 12/31/2014 | 3.1  | 12/01/1986 | 11/30/2014 | 21.6 |
| 31 | Aira+         | 1555 | 35.55 | 9.1   | 01/01/1987 | 10/31/2014 | 11.4 | 06/01/1987 | 12/31/2014 | 41.5 |
| 32 | Mekane selam+ | 2605 | 38.76 | 10.74 | 01/01/1988 | 12/31/2014 | 29.1 | 01/01/1988 | 12/31/2014 | 29.5 |
| 33 | Yetnora +     | 2420 | 38.11 | 10.24 | 01/09/1988 | 11/30/2014 | 8.7  | 09/01/1988 | 12/31/2014 | 38.4 |
| 34 | Lay Birr+     | 1707 | 37.17 | 10.59 | 01/01/1989 | 01/30/2015 | 7.4  | 01/01/1989 | 12/31/2012 | 21.7 |
| 35 | Ayehu+        | 1771 | 36.79 | 10.66 | 01/01/1989 | 12/31/2014 | 12.9 | 01/01/1987 | 12/31/2014 | 48.1 |
| 36 | Motta+        | 2417 | 37.89 | 11.07 | 01/01/1990 | 10/31/2014 | 5.6  | 01/01/1988 | 12/31/2014 | 6.9  |
| 37 | Addis Ababa** | 2354 | 38.75 | 9.03  | 01/01/1970 | 12/31/2011 | 0.6  | 01/01/1970 | 12/31/2011 | 1.8  |
| 38 | Combolicha**  | 1857 | 39.72 | 11.08 | 01/01/1970 | 12/31/2011 | 0.4  | 01/01/1970 | 12/31/2011 | 1.2  |
| 39 | Nekemit**     | 2080 | 36.46 | 9.08  | 01/01/1970 | 12/31/2011 | 2.4  | 12/01/1970 | 12/31/2011 | 8.3  |
| 40 | Assosa**      | 1600 | 34.52 | 10.00 | 01/01/1970 | 12/31/2011 | 20.0 | 01/01/1970 | 12/31/2011 | 24.8 |

\*: Stations selected for statistical trend analysis, \*\*: Stations selected both for statistical trend analysis and for SWAT hydrological model, and +: stations discarded for further analysis

TableS02: Summary of Landsat images and their acquisition dates

|                           |                  |                  |                  |             |                  |
|---------------------------|------------------|------------------|------------------|-------------|------------------|
| LULC map year             | 1985             | 1995             | 2010             | 1973        |                  |
| 1. General information    |                  |                  |                  |             |                  |
| Satellite/Sensor          | Landsat TM       | Landsat TM       | Landsat TM       | Landsat MSS |                  |
| Number of scene           | 16               | 16               | 16               | 16          |                  |
| Pixel resolution(m)       | 30               | 30               | 30               | 60          |                  |
| 2. Image acquisition date |                  |                  |                  |             |                  |
| Paths/Rows                | acquisition date | acquisition date | acquisition date | Paths/Rows  | acquisition date |
| 168/052                   | 01/18/1985       | 12/13/1994       | 11/04/2009       | 180/053     | 01/30/1973       |
| 168/053                   | 04/22/1985       | 12/13/1994       | 11/04/2009       | 181/052     | 01/30/1973       |
| 168/054                   | 01/18/1985       | 01/14/1985       | 12/09/2010       | 181/053     | 12/26/1972       |
| 169/051                   | 11/12/1986       | 12/04/1994       | 01/30/2010       | 181/054     | 01/31/1973       |
| 169/052                   | 11/09/1985       | 12/04/1994       | 01/30/2010       | 181/055     | 01/31/1973       |
| 169/053                   | 04/15/1985       | 01/21/1995       | 01/14/2010       | 182/051     | 12/09/1972       |
| 169/054                   | 03/14/1985       | 01/21/1995       | 01/14/2020       | 182/052     | 02/01/1973       |
| 170/051                   | 02/17/1985       | 02/13/1995       | 12/23/2010       | 182/053     | 12/09/1972       |
| 170/052                   | 02/17/1985       | 02/13/1995       | 01/08/2011       | 182/054     | 02/01/1973       |
| 170/053                   | 02/01/1985       | 02/13/1995       | 01/08/2011       | 182/055     | 02/01/1973       |
| 170/054                   | 02/01/1985       | 12/27/1994       | 01/21/2010       | 183/051     | 11/04/1972       |
| 170/055                   | 01/19/1986       | 01/12/1995       | 11/05/2010       | 183/052     | 01/15/1973       |
| 171/052                   | 04/13/1985       | 02/20/1995       | 01/28/2010       | 183/053     | 01/15/1973       |
| 171/053                   | 04/13/1985       | 01/03/1995       | 01/12/2010       | 183/054     | 01/15/1973       |
| 171/054                   | 12/28/1985       | 01/19/1995       | 01/12/2010       | 184/051     | 12/11/1972       |
| 171/055                   | 04/16/1985       | 04/09/1995       | 11/05/2010       | 184/052     | 11/05/1972       |
