# Supplementary material for: Analysis of combined and isolated effects of land-use and land-cover changes and climate change on the upper Blue Nile River basin's streamflow
Source: Copernicus journal article supplement (doi:10.5194/hess-22-6187-2018), 2018-11-30
Supplement: Supplementary file 2 [file hess-22-6187-2018-supplement.zip]

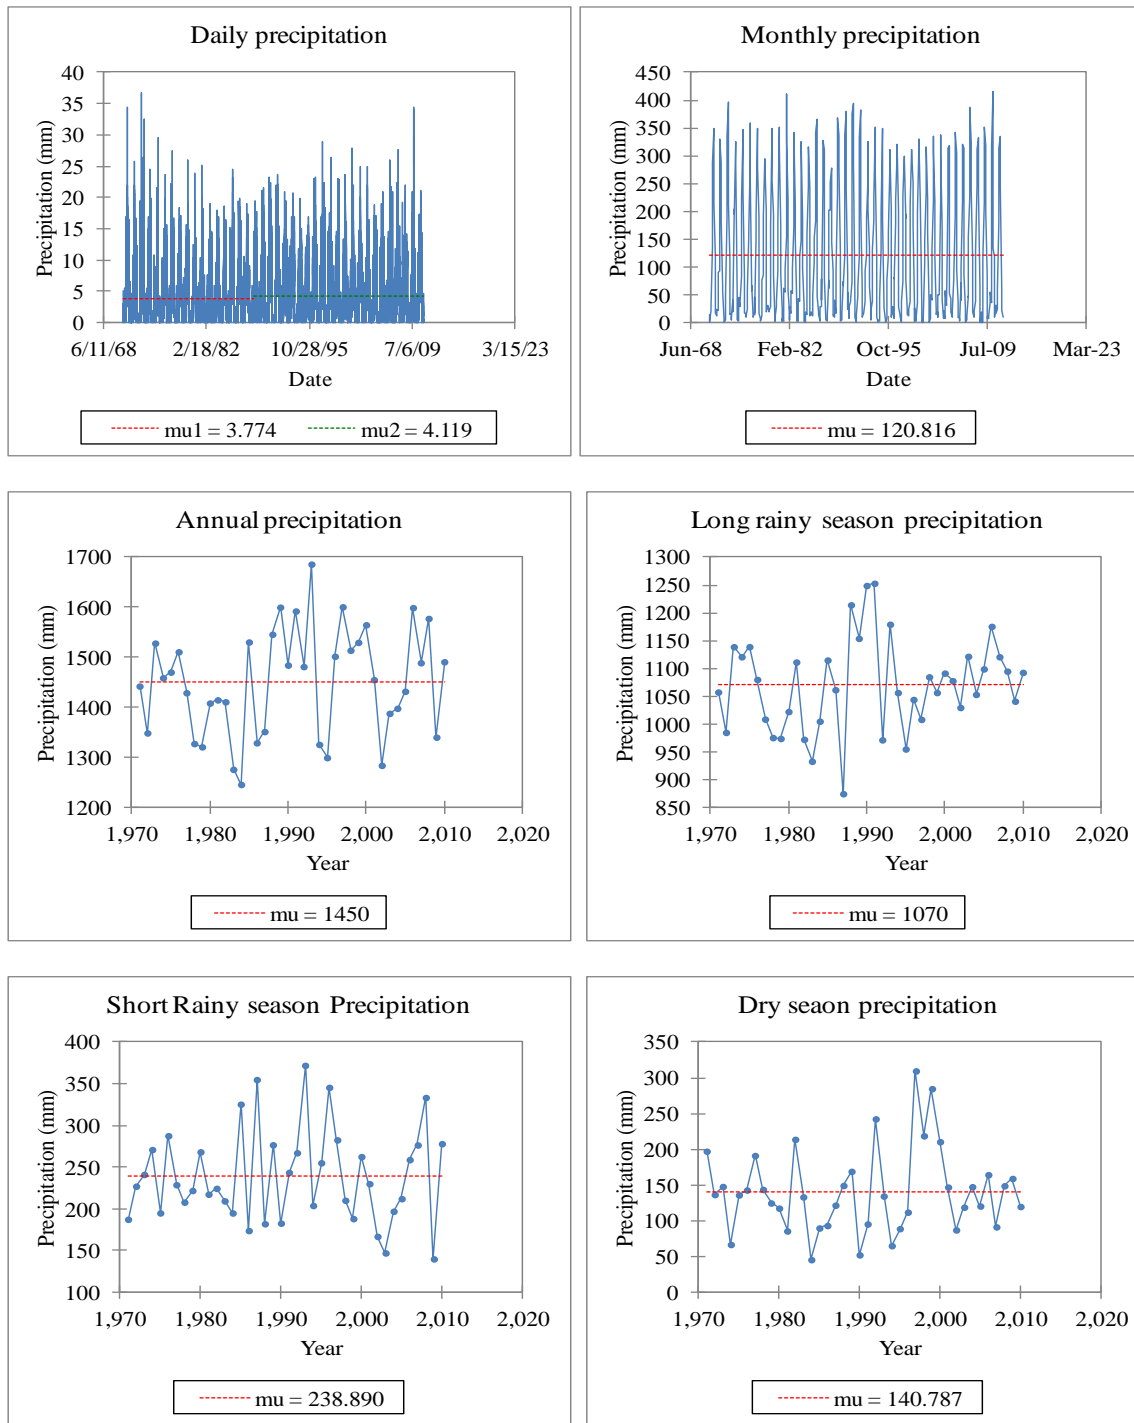

Figure S01: Pettitt change point detection test for precipitation at different time scales

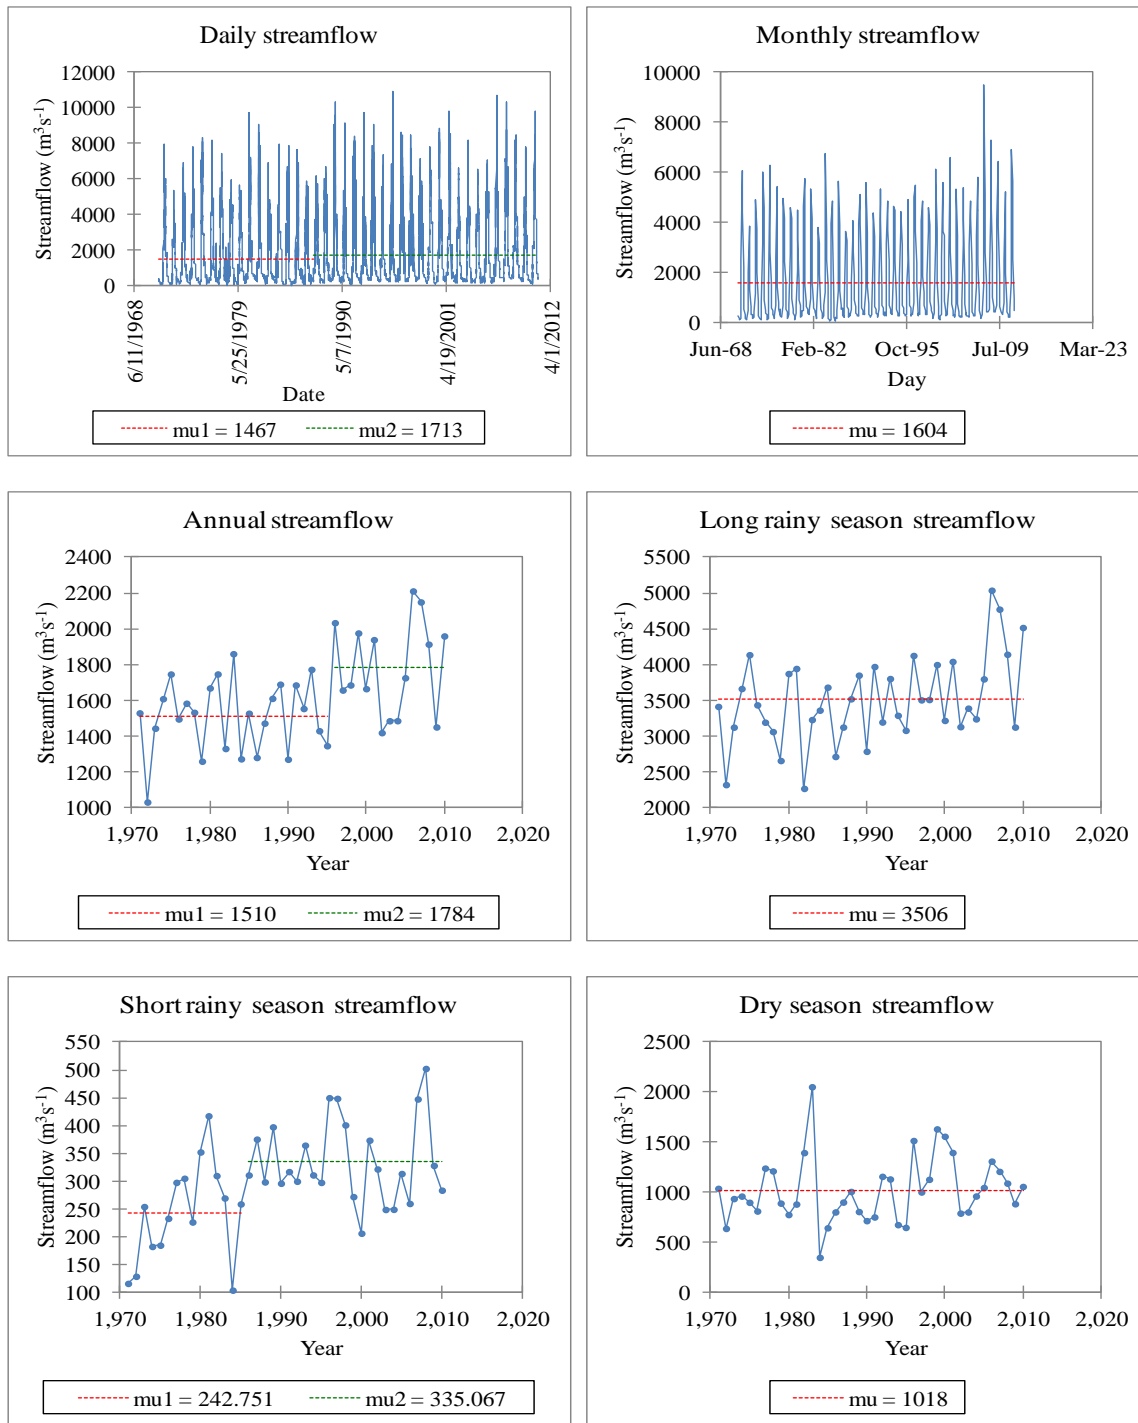

Figure S02: Pettitt change point detection test for streamflow at different time scales
