# Supplementary material for: Analysis of combined and isolated effects of land-use and land-cover changes and climate change on the upper Blue Nile River basin's streamflow
Source: Copernicus journal article supplement (doi:10.5194/hess-22-6187-2018), 2018-11-30
Supplement: Supplementary file 3 [file hess-22-6187-2018-supplement.zip]

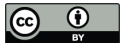

## *Supplement of*

# **Analysis of combined and isolated effects of land-use and land-cover changes and climate change on the upper Blue Nile River basin's streamflow**

**Dagnenet Fenta Mekonnen et al.**

*Correspondence to:* Dagnenet Fenta Mekonnen (dagnfenta@yahoo.com)

- [hess-22-6187-2018-supplement-title-page.pdf](#)
- [supplement](#)
  - [Table supplemental.pdf](#)
  - [supplement figures.pdf](#)

The copyright of individual parts of the supplement might differ from the CC BY 4.0 License.
